# Supplementary material for: HDAC1,2 inhibition impairs EZH2- and BBAP- mediated DNA repair to overcome chemoresistance in EZH2 gain-of-function mutant diffuse large B-cell lymphoma
Source: PubMed Central journal article supplement (PMC4467121; doi:10.18632/oncotarget.3120), 2014-12-31
Supplement: oncotarget-06-4863-s001.pdf [file oncotarget-06-4863-s001.pdf]

## HDAC1,2 inhibition impairs EZH2- and BBAP- mediated DNA repair to overcome chemoresistance in EZH2 gain-of-function mutant diffuse large B-cell lymphoma

### Supplementary Material

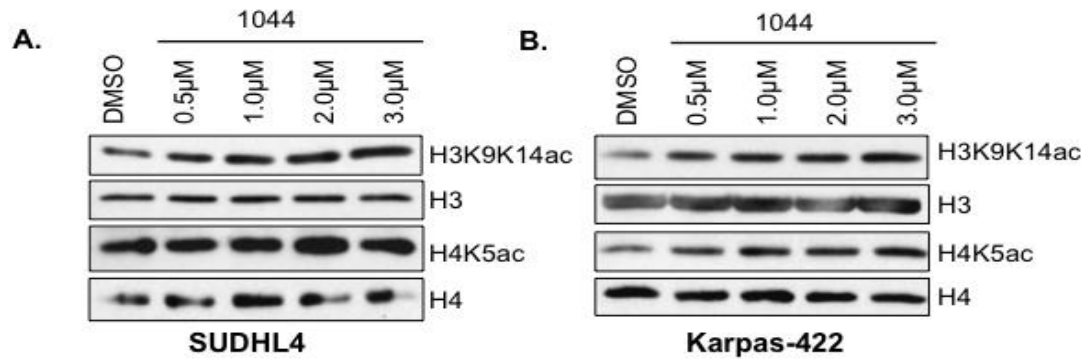

**Supplementary Figure 1:** SUDHL4 (A) and Karpas-422 (B) cells were treated with increasing concentrations of ACY1044 and whole cell lysates were prepared following a 24h treatment. Western blot analysis of H3K9K14ac and H4K5ac was performed. Histone H3 and H4 were used as controls.

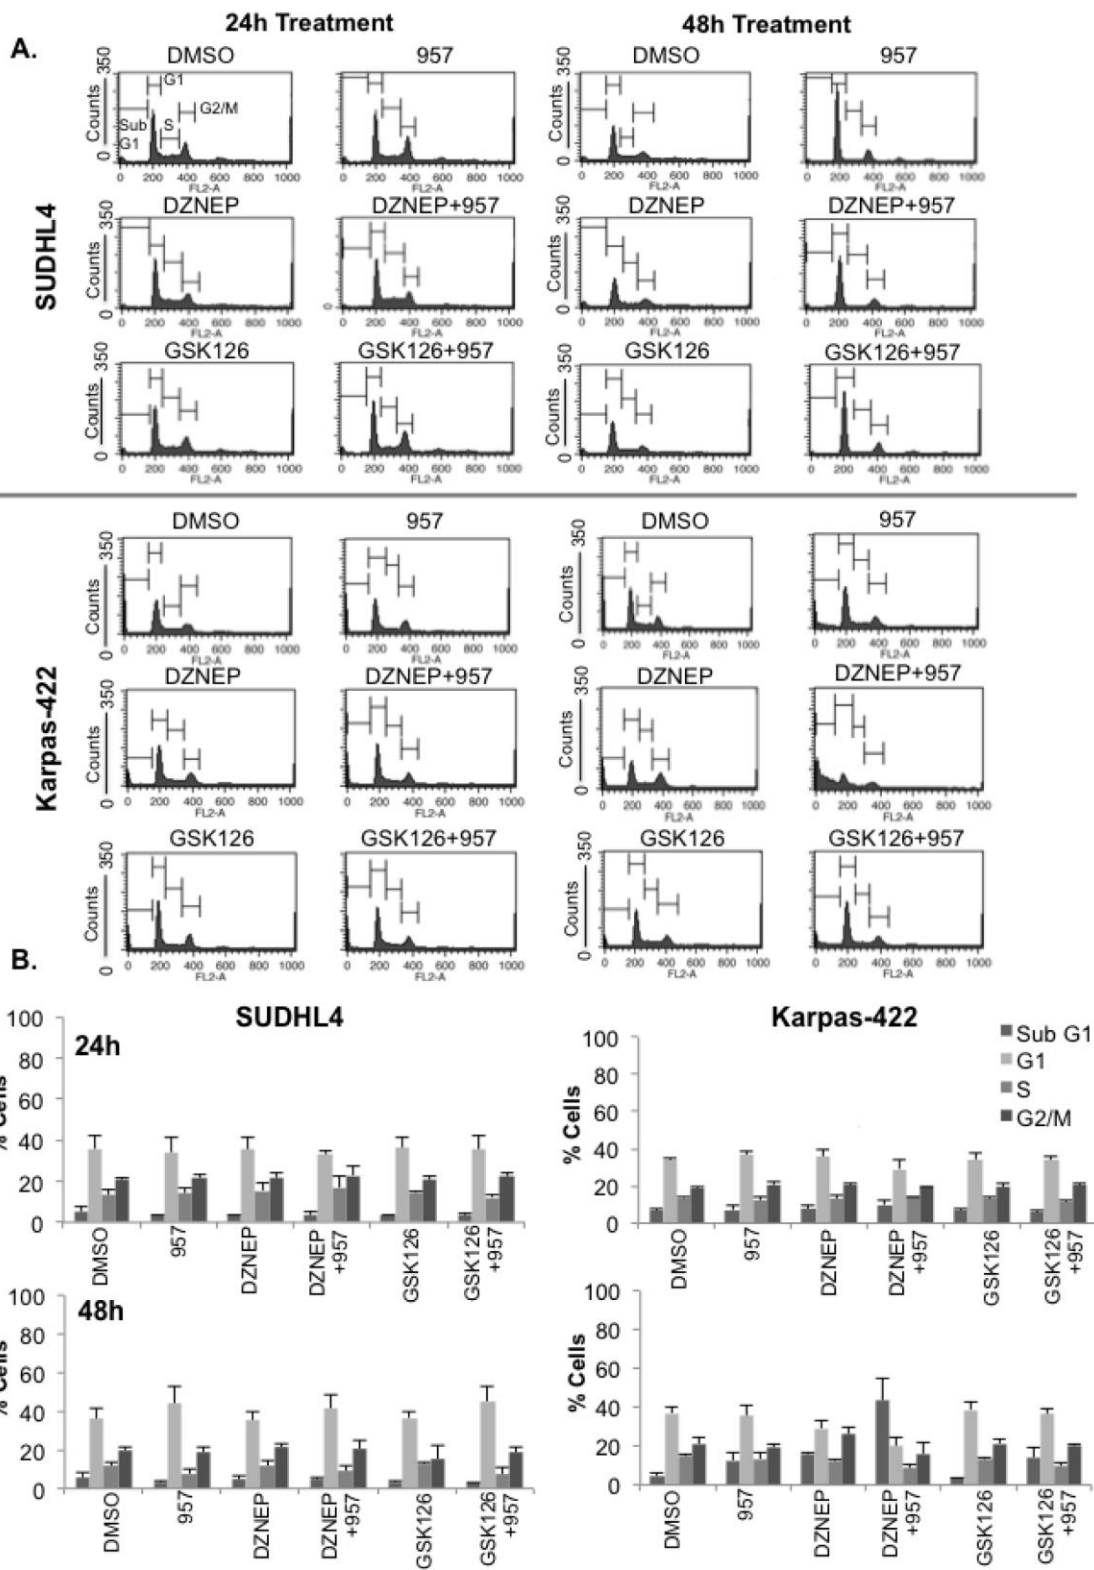

**Supplementary Figure 2: A:** SUDHL4 and Karpas-422 were treated with DMSO, 2 $\mu$ M ACY-957, 0.5 $\mu$ M DZNep, 0.5 $\mu$ M GSK or a combination of drugs for 24 or 48 h and cell cycle analysis of propidium-iodide stained cells was performed. Representative plots are shown in the figure. **B:** Quantitation of the cell cycle analysis performed in A. Data from three independent cell cycle analyses were compiled and average percentage cells with standard errors are shown in this panel.

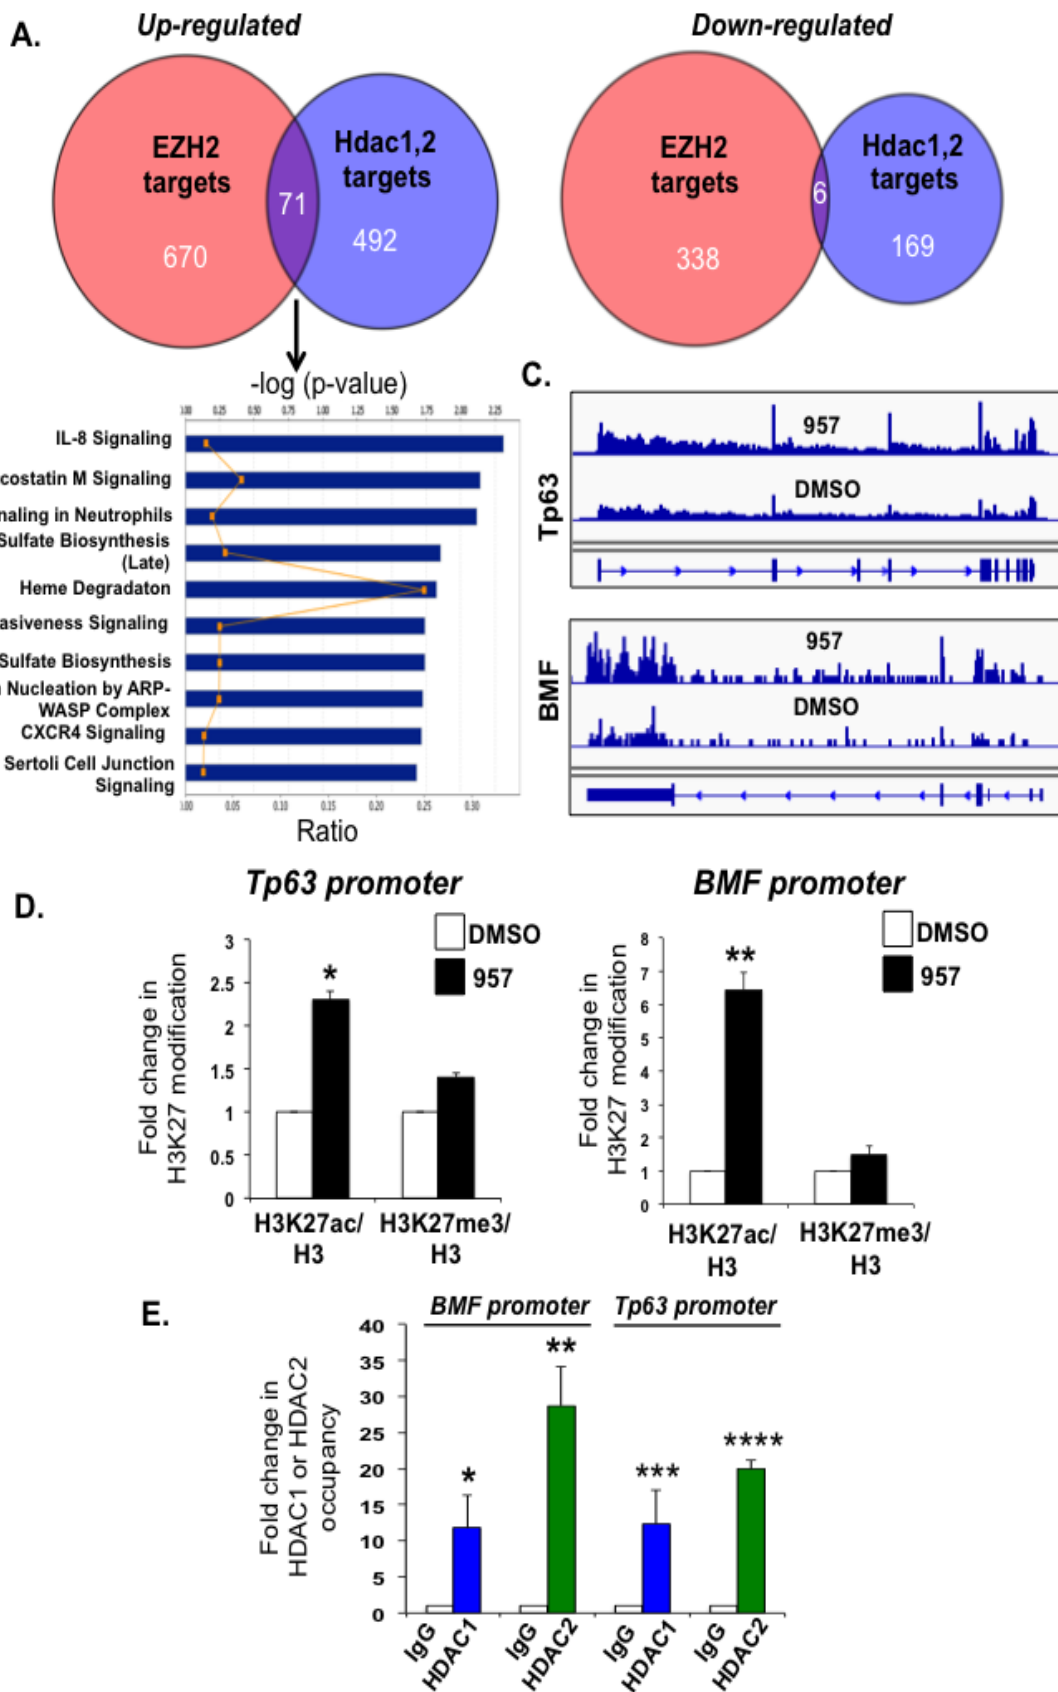

**Supplementary Figure 3: A:** Total RNA was isolated from Karpas-422 cells following a 24h treatment with 2 $\mu$ M ACY-957 for 24h. RNA samples obtained from three independent treatments were subjected to RiboZero stranded sequencing using the Illumina HiSeq2000 sequencer. RNA-seq data from ACY-957-treated samples was compared to the publically available RNA seq data set from Karpas-422 cells following GSK126 treatment of Karpas-422 cells [38]. Venn diagrams were made using the R package VennDiagram. Genes with adjusted p-value < 0.05 and absolute log<sub>2</sub> fold change > 0.585 were used in this analysis. **B:** Pathway analysis of the 71 commonly up regulated genes was performed. Screen shots of the pathways that are misregulated in both ACY-957-treated Karpas-422 cells and in Karpas-422 cells following GSK-126 treatment [38]. Only genes that showed a greater than 1.5-fold change were used in this analysis. The blue bars are the significance (-log (pvalue)), the orange line is the ratio given by number of significant genes in a pathway over number of genes in the pathway. **C:** Base read depth, scaled per million mapped reads, for *BMF* and *Tp63* genes in DMSO- or ACY-957-treated Karpas-422 cells. Screenshots taken from IGV are shown in the figure. **D:** ChIP analysis of H3K27ac, H3K27me<sub>3</sub> and H3 at the promoters of *BMF* and *Tp63* genes was performed following treatment of Karpas-422 cells with either DMSO or 2 $\mu$ M ACY-957. Three independent ChIP experiments with H3K27me<sub>3</sub>, H3K27ac and H3 antibodies were done and the PCR was performed in triplicate. Histone H3 occupancy at a given target locus was used as a control to account for total histone levels. Rabbit IgG was also as a negative control to determine background signal. The threshold cycles from qRT-PCR ( $C_T$  values) obtained for the rabbit IgG control were between 31-33 cycles, and the signal obtained from using the H3K27ac or H3K27me<sub>3</sub> antibodies ranged between 22-28. Hence, we obtained 8- to 512-fold enrichment with the H3K27me<sub>3</sub> or the H3K27ac antibody in our ChIP assays when compared to the rabbit IgG negative control. To calculate fold change in the levels of H3K27 modification at a given target locus, we normalized the  $C_T$  value obtained from H3K27me<sub>3</sub> or H3K27ac ChIP to the  $C_T$  value obtained from histone H3 ChIP. Fold-increase as determined by real-time PCR analysis in H3K27ac relative to total H3 occupancy was calculated for both ACY-957-treated and DMSO-treated samples and the relative fold-enrichment of H3K27ac and H4K27me<sub>3</sub> in ACY-957-treated samples was calculated following normalization to DMSO-treated samples. The data represents an average fold-change calculated from three independent experiments +/- standard error. \* $p=0.003$  and \*\* $p=0.004$  **E:** ChIP analysis of HDAC1 and HDAC2 at the promoters of *BMF* and *Tp63* genes was performed in Karpas-422 cells. Fold-increase as determined by real-time PCR analysis in HDAC1/HDAC2 relative to rabbit IgG occupancy was calculated from two independent experiments. The ChIP signal obtained from the antibodies recognizing HDAC1 or HDAC2 antibodies was normalized to the  $C_T$  values obtained from the input DNA. We then calculated fold enrichment in HDAC1 and HDAC2 ChIP signals relative to the negative rabbit IgG

control. This fold-change is depicted in panel E. Statistical analysis of the ChIP data was performed and p-values were calculated. \* $p=0.07$ , \*\* $p=0.0002$ , \*\*\* $p=0.06$  and \*\*\*\* $p=0.003$ .

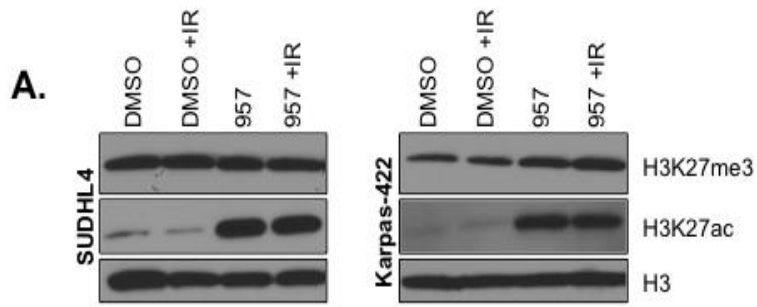

**Karpas-422**

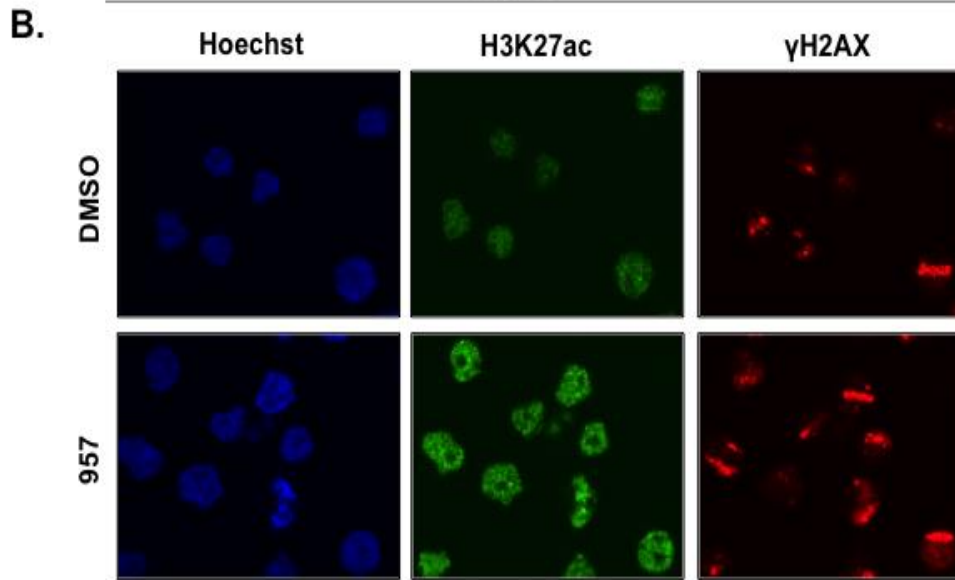

**HeLa**

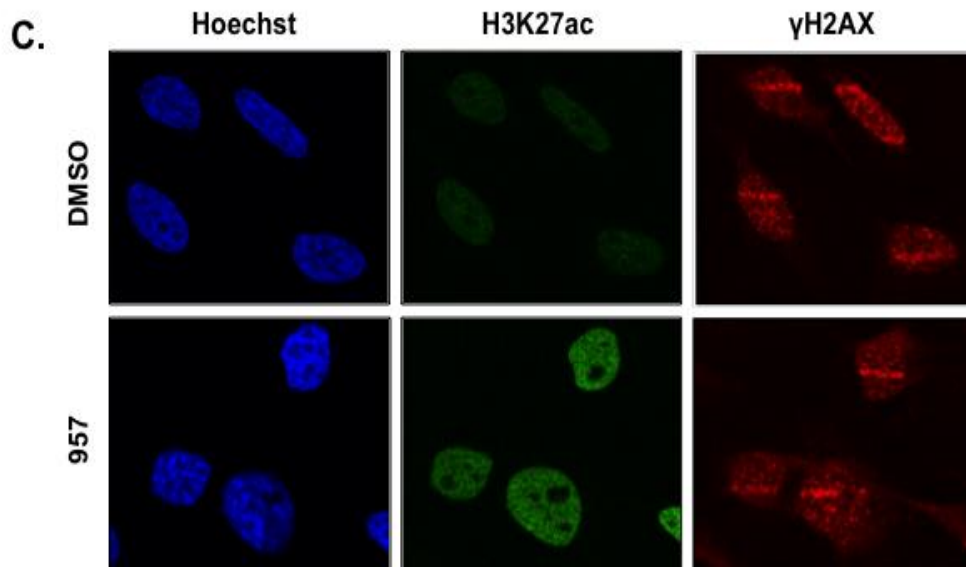

**Supplementary Figure 4: A:** SUDHL4 and Karpas-422 cells were treated with DMSO or 2 $\mu$ M ACY-957 for 48h. Following DMSO or ACY-957 treatment, cells were exposed to a 5Gy dose of ionizing radiation and allowed to recover for 30 minutes prior to chromatin extraction. Western blots were performed with anti-H3K27ac or anti-H3K27me3 with histone H3 serving as a loading control. Karpas-422 (**B**) or HeLa (**C**) cells were micro-irradiated with a laser and allowed to recover for 15 minutes before fixation and immunofluorescence staining was performed with anti- $\gamma$ H2AX and anti-H3K27ac as described in the methods section.
